# Supplementary material for: Time-resolved enantiomer-exchange probed by using the orbital angular momentum of X-ray light
Source: Royal Society of Chemistry journal article supplement (doi:10.1039/d3sc02807k), 2023-01-01
Supplement: d3sc02807k1.pdf [file d3sc02807k1.pdf]

## Supplementary Information for “Time-resolved enantiomer-exchange probed by using the orbital angular momentum of X-ray light”

Xiang Jiang,<sup>1</sup> Yeonsig Nam,<sup>1</sup> Jérémy R. Rouxel,<sup>2</sup> Haiwang Yong,<sup>3</sup> and Shaul Mukamel<sup>1</sup>

<sup>1</sup>*Department of Chemistry and Department of Physics & Astronomy,  
University of California, Irvine, California 92697, USA*

<sup>2</sup>*Chemical Sciences and Engineering Division, Argonne National Laboratory, Lemont, Illinois 60439, USA*

<sup>3</sup>*Department of Chemistry and Biochemistry, University of California San Diego, La Jolla, California 92093, USA*

(Dated: September 7, 2023)

### S-I. TRANSIENT ABSORPTION SIGNALS

We begin the derivation of transient absorption at any pump-probe time delay  $T$  from[1]

$$S(T) = -\frac{2}{\hbar} \text{Im} \int_{t_0}^{+\infty} dt d\mathbf{r} \langle \mathbf{j}(\mathbf{r}, t) \cdot \mathbf{A}^*(\mathbf{r}, t) \rangle \quad (\text{S1})$$

under the light-matter interaction Hamiltonian[2]

$$H_{\text{int}} = - \int d\mathbf{r} \mathbf{j}(\mathbf{r}) \cdot \mathbf{A}(\mathbf{r}, t), \quad (\text{S2})$$

in which  $\mathbf{j}(\mathbf{r})$  is the current density operator and  $\mathbf{A}(\mathbf{r}, t) = \mathbf{A}(\mathbf{r})A(t)$  is the electromagnetic vector potential of the light. In Eq. (S1),  $\mathbf{j}(\mathbf{r}, t) \cdot \mathbf{A}^*(\mathbf{r}, t)$  is written in interaction picture as

$$\mathbf{j}(\mathbf{r}, t) \cdot \mathbf{A}^*(\mathbf{r}, t) = U^\dagger(t, t_0) \mathbf{j}(\mathbf{r}) \cdot \mathbf{A}^*(\mathbf{r}, t) U(t, t_0), \quad (\text{S3})$$

and

$$\langle \mathbf{j}(\mathbf{r}, t) \cdot \mathbf{A}^*(\mathbf{r}, t) \rangle = \langle \psi_I(t) | \mathbf{j}(\mathbf{r}, t) \cdot \mathbf{A}^*(\mathbf{r}, t) | \psi_I(t) \rangle. \quad (\text{S4})$$

Let  $\psi(t_0) = \psi_0$ , under linear response we have

$$|\psi_I(t)\rangle = |\psi_0\rangle + \left(\frac{-i}{\hbar}\right) \int_{t_0}^t dt' d\mathbf{r}' U^\dagger(t', t_0) (-\mathbf{j}(\mathbf{r}') \cdot \mathbf{A}(\mathbf{r}', t')) U(t', t_0) |\psi_0\rangle. \quad (\text{S5})$$

Then the transient absorption can be written as

$$\begin{aligned} S(T) &= -\frac{2}{\hbar} \text{Im} \int_{t_0}^{+\infty} dt \int_{t_0}^t dt' \int d\mathbf{r} d\mathbf{r}' \mathbf{A}^*(\mathbf{r}, t) \\ &\quad \times \left(\frac{-i}{\hbar}\right) \left[ \mathbf{A}(\mathbf{r}', t') \langle \psi_0 | U^\dagger(t, t_0) \mathbf{j}(\mathbf{r}) U(t, t_0) U^\dagger(t', t_0) (-\mathbf{j}(\mathbf{r}')) U(t', t_0) | \psi_0 \rangle \right. \\ &\quad \left. - \mathbf{A}^*(\mathbf{r}', t') \langle \psi_0 | U^\dagger(t', t_0) (-\mathbf{j}(\mathbf{r}')) U(t', t_0) U^\dagger(t, t_0) \mathbf{j}(\mathbf{r}) U(t, t_0) | \psi_0 \rangle \right] \\ &= -\frac{2}{\hbar^2} \text{Re} \int_{t_0}^{+\infty} dt \int_{t_0}^t dt' \int d\mathbf{r} d\mathbf{r}' \mathbf{A}^*(\mathbf{r}, t) \\ &\quad \times \left[ \mathbf{A}(\mathbf{r}', t') \langle \psi_0 | U^\dagger(t, t_0) \mathbf{j}(\mathbf{r}) U(t, t') \mathbf{j}(\mathbf{r}') U(t', t_0) | \psi_0 \rangle \right. \\ &\quad \left. - \mathbf{A}^*(\mathbf{r}', t') \langle \psi_0 | U^\dagger(t', t_0) \mathbf{j}(\mathbf{r}') U^\dagger(t, t') \mathbf{j}(\mathbf{r}) U(t, t_0) | \psi_0 \rangle \right]. \end{aligned} \quad (\text{S6})$$

After the substitution of  $\tau = t - t'$  and  $dt' = -d\tau$ , we have

$$\begin{aligned} S(T) &= -\frac{2}{\hbar^2} \text{Re} \int_{t_0}^{+\infty} dt \int_0^{t-t_0} d\tau \int d\mathbf{r} d\mathbf{r}' \mathbf{A}^*(\mathbf{r}, t) \\ &\quad \times \left[ \mathbf{A}(\mathbf{r}', t - \tau) \langle \psi_0 | U^\dagger(t, t_0) \mathbf{j}(\mathbf{r}) U(\tau) \mathbf{j}(\mathbf{r}') U(t - \tau, t_0) | \psi_0 \rangle \right. \\ &\quad \left. - \mathbf{A}^*(\mathbf{r}', t - \tau) \langle \psi_0 | U^\dagger(t - \tau, t_0) \mathbf{j}(\mathbf{r}') U^\dagger(\tau) \mathbf{j}(\mathbf{r}) U(t, t_0) | \psi_0 \rangle \right]. \end{aligned} \quad (\text{S7})$$

After defining

$$d_{ij} = \langle \varphi_i(\mathbf{r}) | \mathbf{A}(\mathbf{r}) \cdot \mathbf{j}(\mathbf{r}) | \varphi_j(\mathbf{r}) \rangle, \quad (\text{S8})$$

using the Born-Oppenheimer approximation

$$|\psi(\mathbf{r}, \mathbf{q}, t)\rangle = \sum_e c_e(t) |\chi_e(\mathbf{q}, t)\rangle |\varphi_e(\mathbf{r}, \mathbf{q})\rangle \quad (\text{S9})$$

for separating the nuclei and electron wavefunction, expanding  $U(\tau)$  in core states, and inserting  $t_0 \rightarrow -\infty$ , we can rewrite Eq. (S7) as

$$\begin{aligned} S(T) = & -\frac{2}{\hbar^2} \text{Re} \int_{-\infty}^{+\infty} dt \int_0^{+\infty} d\tau e^{-i\omega_{ee'}t} A^*(t) \\ & \times \sum_{ee'c} \left[ A(t-\tau) c_{e'}^*(t) c_e(t-\tau) \langle \chi_{e'}(t) | d_{ce'}^* U_{cc}(\tau) d_{ce} | \chi_e(t-\tau) \rangle e^{i\omega_e \tau} \right. \\ & \left. - A^*(t-\tau) c_{e'}^*(t-\tau) c_e(t) \langle \chi_{e'}(t-\tau) | d_{ce'}^* U_{cc}^\dagger(\tau) d_{ec}^* | \chi_e(t) \rangle e^{-i\omega_{e'} \tau} \right], \end{aligned} \quad (\text{S10})$$

where  $\omega_{e(e')}$  =  $E_{e(e' )}/\hbar$ ,  $\omega_{ee'} = \omega_e - \omega_{e'}$ , and we also used  $U(t, t_0) |\psi_0\rangle = \sum_e c_e e^{-i\omega_e t} |\chi_e\rangle |\varphi_e\rangle$ .

Then we consider a Gaussian type light wave packet whose center at pump-probe time delay  $T$

$$A(t) = A_0 \mathcal{A}(t) e^{-i\omega t}, \quad \mathcal{A}(t) = \frac{1}{\sqrt{2\pi\xi}} \exp\left[-\frac{(t-T)^2}{2\xi^2}\right], \quad (\text{S11})$$

and introduce the step function

$$\theta(\tau) = \begin{cases} 1 & \tau > 0 \\ 0 & \tau < 0 \end{cases}$$

to change the integral lower limit of  $\tau$  to  $-\infty$  with

$$\begin{aligned} \theta(\tau) U_{cc}(\tau) e^{i\omega_e \tau} &= \theta(\tau) \exp[-i(\omega_c - \omega_e)\tau], \quad \omega_c = E_c/\hbar \\ &= -\frac{1}{2\pi i} \int_{-\infty}^{+\infty} \frac{d\Omega}{\Omega - \omega_{ce} + i\Gamma_c} \exp(-i\Omega\tau), \quad \omega_{ce} = \omega_c - \omega_e. \end{aligned} \quad (\text{S12})$$

We can rewrite Eq. (S10) as

$$\begin{aligned} S(\omega, T) = & \frac{1}{\pi\hbar^2} \sum_{ee'c} \text{Im} \int_{-\infty}^{+\infty} d\Omega \int_{-\infty}^{+\infty} dt \int_{-\infty}^{+\infty} d\tau e^{-i\omega_{ee'}t} e^{-i\Omega\tau} \\ & \left[ \mathcal{A}^*(t) c_{e'}^*(t) \langle \chi_{e'}(t) | \frac{d_{ce'}^* d_{ce}}{\Omega + \omega - \omega_{ce} + i\Gamma_c} | \chi_e(t-\tau) \rangle c_e(t-\tau) \mathcal{A}(t-\tau) \right. \\ & \left. - \mathcal{A}^*(t-\tau) c_{e'}^*(t-\tau) \langle \chi_{e'}(t-\tau) | \frac{d_{ce'}^* d_{ec}^*}{\Omega - \omega - (\omega_c + \omega_{e'}) + i\Gamma_c} | \chi_e(t) \rangle c_e(t) \mathcal{A}^*(t) e^{i(2\omega)t} \right] \end{aligned} \quad (\text{S13})$$

The third line in Eq.(S13) should be ignored. First of all, we define a time domain function  $f_e(t) = \mathcal{A}(t) c_e(t) |\chi_e(t)\rangle$  and then the time domain integral of the third line in Eq.(S13) can be written as

$$\int_{-\infty}^{+\infty} \left[ \int_{-\infty}^{+\infty} f_{e'}^*(t-\tau) f_e(t) e^{-i(\omega_{e'} - 2\omega)t} dt \right] e^{-i\Omega\tau} d\tau \quad (\text{S14})$$

after defining

$$\mathcal{F}[f(t)](\omega) = \int_{-\infty}^{+\infty} f(t) e^{-i\omega t} dt.$$

By using the cross-correlation and frequency-shift property, Eq.(S14) can be written as

$$\mathcal{F}[f_e(t)]^*(\Omega) \cdot \mathcal{F}[f_{e'}(t)](\Omega + \omega_{ee'} - 2\omega). \quad (\text{S15})$$

Since

$$\mathcal{F}[\mathcal{A}(t)](\omega) = \exp\left(-\frac{\xi^2\omega^2}{2}\right)e^{-i\omega T}, \quad (\text{S16})$$

the Fourier transform of  $f_{e(e')}(t)$  also gives Gaussian similar result with a full width at half maximum (FWHM) of  $2\sqrt{2\ln 2}/\xi \sim 2$  eV. So, to guarantee the nonvanishing of Eq.(S15), there are limitations of  $\Omega \sim 0$  and  $\omega \sim \omega_{ee'}/2$ . But the limitations will result a large denominator of third line of Eq.(S13) since the core state energy  $\omega_c$  is always much larger than valence state energy  $\omega_{e(e')}$ , which will give a vanishing contribution to total signal. By throwing away the the third line of Eq.(S13) and redefining the Fourier transform (FT) as

$$\mathcal{F}[f(t)](\omega) = \int_{-\infty}^{+\infty} f(t)e^{i\omega t} dt,$$

The transient absorption can be finally written as

$$S_{\text{abs}}(\omega, T) = \frac{1}{\pi\hbar^2} \sum_{ee'c} \text{Im} \int d\mathbf{q} d_{ce'}^* d_{ce} \int_{-\infty}^{+\infty} d\Omega \frac{\mathcal{F}[f_{e'}(t)]^*(\Omega + \omega_{ee'}) \mathcal{F}[f_e(t)](\Omega)}{\Omega + \omega - \omega_{ce} + i\Gamma_c}, \quad (\text{S17})$$

which is mentioned in the main text.

## S-II. EXPANDING THE LAGUERRE-GAUSSIAN BEAM AND THE TRANSITION CURRENT DENSITY IN HERMITE-GAUSSIAN BASIS

In general, the size of the molecule is much smaller than the range of the beam. Since we choose  $w_0 = 60$  nm in our simulation, we can do the approximation in the Laguerre-Gaussian (LG) beam as  $w(z) \rightarrow w_0$ ,  $R(z) \rightarrow \infty$ ,  $\frac{z}{R} \rightarrow 0$ , and the LG beam is simplified to

$$\text{LG}_{lp}(r, \phi, z) = \frac{1}{w_0} \sqrt{\frac{2p!}{\pi(p+|l|)!}} \exp\left(-\frac{r^2}{w_0^2}\right) \left(\frac{\sqrt{2}r}{w_0}\right)^{|l|} L_p^{|l|}\left(\frac{2r^2}{w_0^2}\right) e^{il\phi} e^{ikz}. \quad (\text{S18})$$

There are examples of the spatial profiles of the LG beams with  $l = \pm 1$  shown in Fig. 1 of main text, as well as compared with circularly polarized light.

For the definition of the Laguerre polynomials

$$L_p^l(x) = \frac{e^x x^{-l}}{p!} \frac{d^p}{dx^p} (e^{-x} x^{p+l}), \quad (\text{S19})$$

and the Hermite polynomials

$$H_t(x) = (-1)^t \exp(x^2) \left(\frac{d}{dx}\right)^t \exp(-x^2), \quad (\text{S20})$$

we can write the follow expansion[3]:

$$\begin{aligned} \mathcal{L}_{lp}(x, y) &\equiv e^{il\phi} r^{|l|} L_p^{|l|}(r^2) \\ &= \frac{(-1)^p}{2^{2p+|l|} p!} \sum_{u=0}^p \sum_{v=0}^{|l|} i^{\text{sgn}(l)v} \binom{p}{u} \binom{|l|}{v} H_{2u+|l|-v}(x) H_{2p-2u+v}(y), \end{aligned} \quad (\text{S21})$$

in which  $\text{sgn}()$  is the sign function. The LG beam is finally written as

$$\text{LG}_{lp}(x, y, z) = \frac{1}{w_0} \sqrt{\frac{2p!}{\pi(p+|l|)!}} \exp\left(-\frac{x^2 + y^2}{w_0^2}\right) \mathcal{L}_{lp}\left(\frac{\sqrt{2}x}{w_0}, \frac{\sqrt{2}y}{w_0}\right) e^{ikz}, \quad (\text{S22})$$

and the vector potential of LG beam reads

$$\mathbf{A}(\mathbf{r}, l) = \text{LG}_{lp}(x, y, z) \frac{\hat{\mathbf{e}}_x + i\sigma\hat{\mathbf{e}}_y}{\sqrt{1+|\sigma|}}, \quad (\text{S23})$$

where  $\sigma = 0, +1, -1$  corresponds to linearly polarized, left circularly polarized, and right circularly polarized light. Next we consider the transition current density. First the electronic wavefunctions are expanded in Gaussian basis as

$$\varphi_\mu(\mathbf{r}) = \sum_A c_{\mu A} \sum_a \beta_a G_{ijk}(\mathbf{r}_A, a), A \equiv \{\mathbf{r}_A, \{a, \beta_a, i, j, k\}\}, \quad (\text{S24})$$

in which

$$G_{ijk}(\mathbf{r}, a, \mathbf{A}) = G_{ijk}(a, \mathbf{r}_A) = x_A^i y_A^j z_A^k \exp(-ar_A^2), \begin{cases} a > 0 \\ \mathbf{r}_A = \mathbf{r} - \mathbf{A} \\ i \geq 0, j \geq 0, k \geq 0 \end{cases} \quad (\text{S25})$$

is the Cartesian Gaussian-type orbitals (CGTO), and  $c_{\mu A}$  are the expansion coefficients on different Gaussian center  $A$  with various CGTO parameters. Second the CGTO can be separated into three Cartesian directions

$$G_{ijk}(a, \mathbf{r}_A) = G_i(a, x_A) G_j(a, y_A) G_k(a, z_A) \quad (\text{S26})$$

with one-dimension CGTO (1d-CGTO)

$$\begin{aligned} G_i(a, x_A) &= x_A^i \exp(-ax_A^2) \\ \frac{\partial G_i(a, x_A)}{\partial x} &= -2aG_{i+1}(a, x_A) + iG_{i-1}(a, x_A) \end{aligned} \quad (\text{S27})$$

and the product of two 1d-CGTO can be expanded in Gaussian-Hermite functions as

$$\Omega_{ij}(x; a, b, A_x, B_x) \equiv G_i(a, x_A) G_j(b, x_B) = \sum_{t=0}^{i+j} E_t^{ij} \Lambda_t(p, x_P) \quad (\text{S28})$$

in which  $p = a + b$ ,  $P_x = (aA_x + bB_x)/p$ ,  $E_t^{ij}$  are the expansion coefficients, and  $\Lambda_t(p, x_P)$  is the Gaussian-Hermite function reads

$$\begin{aligned} \Lambda_t(p, x_P) &\equiv \left( \frac{\partial}{\partial P_x} \right)^t \exp(-px_P^2) \\ &= p^{t/2} H_t(p^{1/2} x_P) \exp(-px_P^2). \end{aligned} \quad (\text{S29})$$

So, the transition current density

$$\mathbf{j}_{\mu\nu}(\mathbf{r}) \equiv \frac{e\hbar}{2m_e i} [\varphi_\mu^*(\nabla \varphi_\nu) - (\nabla \varphi_\mu^*) \varphi_\nu] \quad (\text{S30})$$

can be written as

$$\begin{aligned} \mathbf{j}_{\mu\nu} &= \frac{1}{2i} [\varphi_\mu(\nabla \varphi_\nu) - (\nabla \varphi_\mu) \varphi_\nu] = \frac{1}{2i} \sum_{AB} c_{\mu A} c_{\nu B} \sum_{ab} \beta_a \gamma_b \{ \\ &\quad [lG_i(a, x_A) G_{l-1}(b, x_B) - 2bG_i(a, x_A) G_{l+1}(b, x_B) - iG_{i-1}(a, x_A) G_l(b, x_B) + 2aG_{i+1}(a, x_A) G_l(b, x_B)] \\ &\quad \times G_j(a, y_A) G_m(b, y_B) G_k(a, z_A) G_n(b, z_B) \hat{\mathbf{e}}_x + \\ &\quad [mG_j(a, y_A) G_{m-1}(b, y_B) - 2bG_j(a, y_A) G_{m+1}(b, y_B) - jG_{j-1}(a, y_A) G_m(b, y_B) + 2aG_{j+1}(a, y_A) G_m(b, y_B)] \\ &\quad \times G_i(a, x_A) G_l(b, x_B) G_k(a, z_A) G_n(b, z_B) \hat{\mathbf{e}}_y + \\ &\quad [nG_k(a, z_A) G_{n-1}(b, z_B) - 2bG_k(a, z_A) G_{n+1}(b, z_B) - kG_{k-1}(a, z_A) G_n(b, z_B) + 2aG_{k+1}(a, z_A) G_n(b, z_B)] \\ &\quad \times G_i(a, x_A) G_l(b, x_B) G_j(a, y_A) G_m(b, y_B) \hat{\mathbf{e}}_z \}. \end{aligned} \quad (\text{S31})$$

By using the multiplication theorem of Hermite polynomials

$$H_s(\lambda x) = s! \sum_{t=0}^{\lfloor s/2 \rfloor} \frac{(\lambda^2 - 1)^t \lambda^{s-2t}}{t!(s-2t)!} H_{s-2t}(x) \quad (\text{S32})$$

and the overlap integrals between Hermite Gaussians[4]

$$\int \Lambda_m(a, x_A) \Lambda_n(b, x_B) dx = (-1)^n \left( \frac{\pi}{a+b} \right)^{1/2} \Lambda_{m+n} \left( \frac{ab}{a+b}, B_x - A_x \right), \quad (\text{S33})$$

the light-matter interaction quantity defined in Eq. (S8) is finally written as

$$\begin{aligned} d_{\mu\nu} = & \int \mathbf{A}(\mathbf{r}; \sigma, q, L, w_0, \kappa) \cdot \mathbf{j}_{\mu\nu}(\mathbf{r}) d\mathbf{r} = \frac{1}{2i} \frac{1}{w_0} \sqrt{\frac{2q!}{\pi(q+|L|)! 2^{2q+|L|} q!}} \frac{(-1)^q}{2^{2q+|L|} q!} \sum_{AB} c_{\mu A} c_{\nu B} \sum_{ab} \beta_a \gamma_b \\ & \left[ \sum_{t=0}^{k+n} E_{Zt}^{kn} I_t(p, P_z, \kappa) \right] \sum_{u=0}^q \sum_{v=0}^{|L|} i^{\text{sgn}(L)v} \binom{q}{u} \binom{|L|}{v} \left\{ \right. \\ & \left. \left[ \sum_{t=0}^{i+l+1} \left( l E_{Xt}^{i,l-1} - 2b E_{Xt}^{i,l+1} - i E_{Xt}^{i-1,l} + 2a E_{Xt}^{i+1,l} \right) I_{2u+|L|-v,t}(p, P_x, w_0) \right] \right. \\ & \left. \times \left[ \sum_{t=0}^{j+m} E_{Yt}^{jm} I_{2q-2u+v,t}(p, P_y, w_0) \right] \right. \\ & \left. + i\sigma \left[ \sum_{t=0}^{j+m+1} \left( m E_{Yt}^{j,m-1} - 2b E_{Yt}^{j,m+1} - j E_{Yt}^{j-1,m} + 2a E_{Yt}^{j+1,m} \right) I_{2q-2u+v,t}(p, P_y, w_0) \right] \right. \\ & \left. \times \left[ \sum_{t=0}^{i+l} E_{Xt}^{il} I_{2u+|L|-v,t}(p, P_x, w_0) \right] \right\}, \quad (\text{S34}) \end{aligned}$$

in which the LG beam is  $\text{LG}_{Lq}$ ,  $\kappa$  is the wavevector of LG light,  $w_0$  is the beam waist,  $\sigma$  is the LG light polarization, the integral  $I_{st}$  in  $x$ - $y$  plane is

$$\begin{aligned} I_{st}(p, P_x, w_0) & \equiv \int \exp\left(-\frac{x^2}{w_0^2}\right) H_s\left(\frac{\sqrt{2}x}{w_0}\right) \Lambda_t(p, x_P) dx \\ & = \left(\frac{\pi}{w_0^2 + p}\right)^{1/2} (\sqrt{2}w_0)^s s! (-1)^t \sum_{u=0}^{\lfloor s/2 \rfloor} \left(\frac{1}{2w_0^2}\right)^u \frac{1}{u!(s-2u)!} \Lambda_{s+t-2u}\left(\frac{p}{1+pw_0^2}, P_x\right), \quad (\text{S35}) \end{aligned}$$

and the integral  $I_t$  in  $z$  direction is

$$\begin{aligned} I_t(p, P_z, \kappa) & \equiv \int \Lambda_t(p, z_P) e^{i\kappa z} dz \\ & = \sqrt{\pi} p^{\frac{t-1}{2}} e^{i\kappa P_z} e^{-\frac{\kappa^2}{4p}} \left(\frac{i\kappa}{\sqrt{p}}\right)^t. \quad (\text{S36}) \end{aligned}$$

### S-III. NUCLEAR WAVEPACKET DYNAMICS

The out-of-plane bending motion of the CHO group at the  $1170 \text{ cm}^{-1}$  normal mode (orange arrows in Fig. 2(a) of main text) is used to construct an one-dimensional nuclear degrees of freedom for our effective Hamiltonian. All quantities, including the potential surfaces of the electronic states and transition dipole moments between valence and core-excited states were evaluated at a total of 351 nuclear grid points. The interaction with the pump-pulse is numerically included in the propagation scheme, by using a 10-fs FWHM Gaussian laser pump in resonance with the  $S_0 \rightarrow S_1$  transition,

$$\mathcal{E}_{\text{pu}}(t) = a_{\text{pu}} e^{-\frac{(t-t_0)^2}{2\sigma^2}} \cos(\omega_{\text{pu}}(t-t_0)) \quad (\text{S37})$$

where  $a_{\text{pu}} = 4.875 \times 10^{-2}$  au is the electric field amplitude.  $\omega_{\text{pu}} = 5.85 \text{ eV}$  is the central frequency corresponding to the energy gap between the ground state and the  $S_1$  state at the Franck-Condon point, and  $\sigma = 10 \text{ fs}$  is the temporal

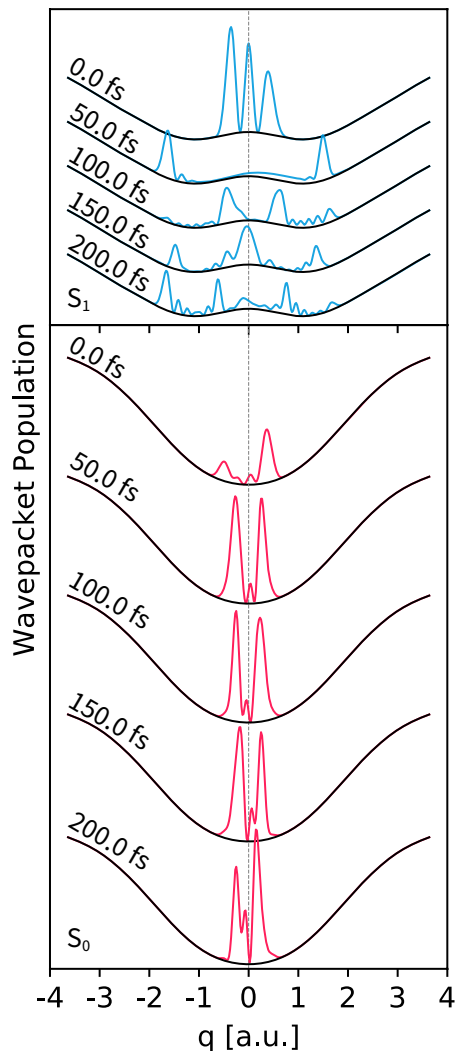

FIG. S1. The wavepacket snapshots of the ground state  $S_0$  (bottom panel) and the valence excited state  $S_1$  (top panel).

duration of the pump pulse. The nuclear wavepacket is then propagated by numerically solving the time-dependent Schrodinger equation on the one-dimensional nuclear grid[5]:

$$i\hbar \frac{\partial}{\partial t} \psi = \mathbf{H} \psi = \left[ \mathbf{T} + \mathbf{V} - \boldsymbol{\mu} \boldsymbol{\varepsilon}(t) \right] \psi, \quad (\text{S38})$$

$\mathbf{T}$  is the kinetic energy operator of the nuclei,  $\mathbf{V}$  is the potential energy operator, and  $\boldsymbol{\mu} \boldsymbol{\varepsilon}(t)$  describes the light-matter interaction. In our simulation, the propagation of nuclear wavepackets on core-excited states are neglected. The Chebychev propagation[5] with a 0.048 fs time step is employed to propagate this wavepacket until the final time of 458.79 fs. Some wavepacket snapshots are shown in Fig. S1.

#### S-IV. TIME-RESOLVED HELICAL DICHROISM (TR-HD) AND TIME-RESOLVED CIRCULAR-HELICAL DICHROISM (TR-CHD) FOR ALL HELICAL INDEX $l$

In our simulation, we choose  $p = 0$  in the LG beam  $\text{LG}_{lp}$ , and we give all simulation results of tr-HD and tr-CHD with  $l = 1$  to 4 in the following figures.

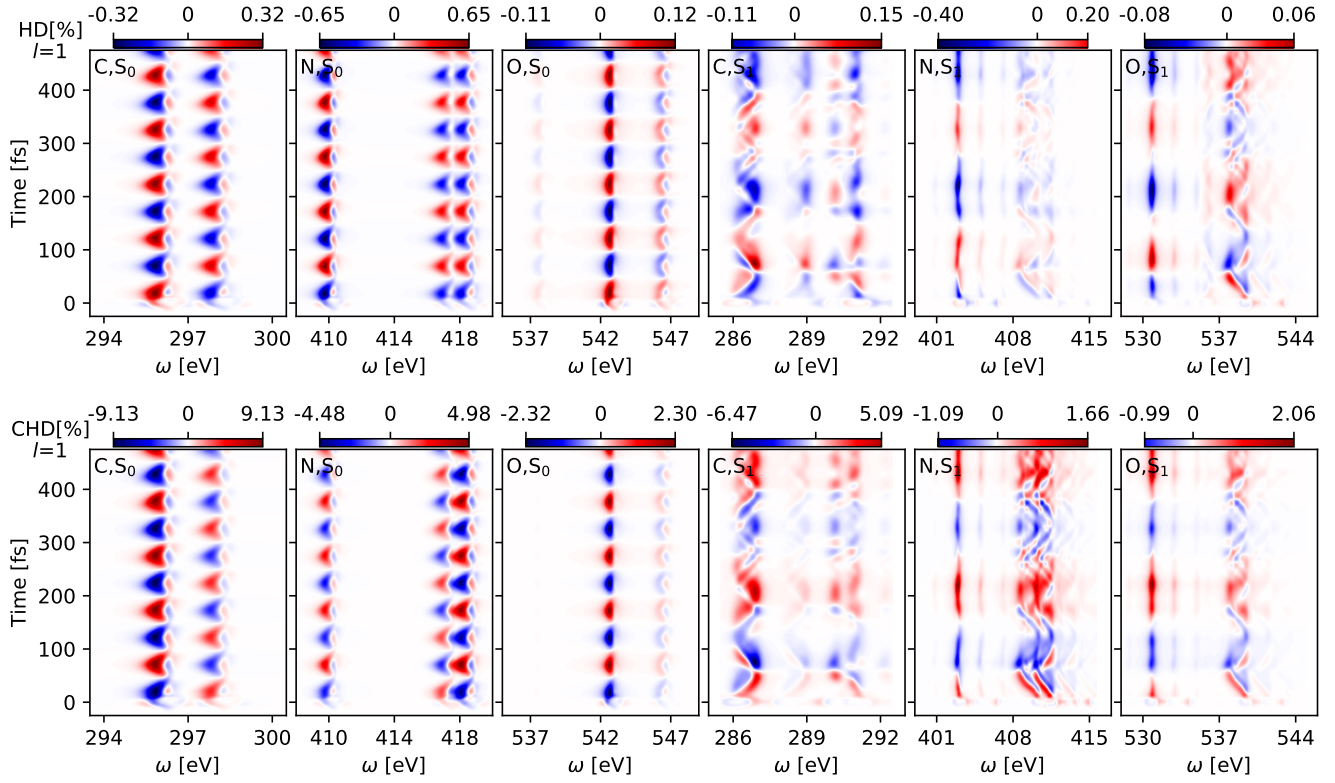

FIG. S2. The tr-HD (top panels) and tr-CHD (bottom panels) signals for  $l = 1$  by probing C, N, and O. Left three panels: contributed by ground state  $S_0$ . Right three panels: contributed by valence excited state  $S_1$

- 
- [1] Y. Nam, J. R. Rouxel, J. Y. Lee, and S. Mukamel, Monitoring aromatic ring-currents in mg-porphyrin by time-resolved circular dichroism, *Phys. Chem. Chem. Phys.* **22**, 26605 (2020).
  - [2] S. Tanaka, V. Chernyak, and S. Mukamel, Time-resolved x-ray spectroscopies: Nonlinear response functions and liouville-space pathways, *Phys. Rev. A* **63**, 063405 (2001).
  - [3] I. Kimel and L. Elias, Relations between hermite and laguerre gaussian modes, *IEEE Journal of Quantum Electronics* **29**, 2562 (1993).
  - [4] T. Živković and Z. B. Maksić, Explicit Formulas for Molecular Integrals over Hermite–Gaussian Functions, *The Journal of Chemical Physics* **49**, 3083 (1968).
  - [5] H. Tal-Ezer and R. Kosloff, An accurate and efficient scheme for propagating the time dependent Schrödinger equation, *The Journal of Chemical Physics* **81**, 3967 (1984).

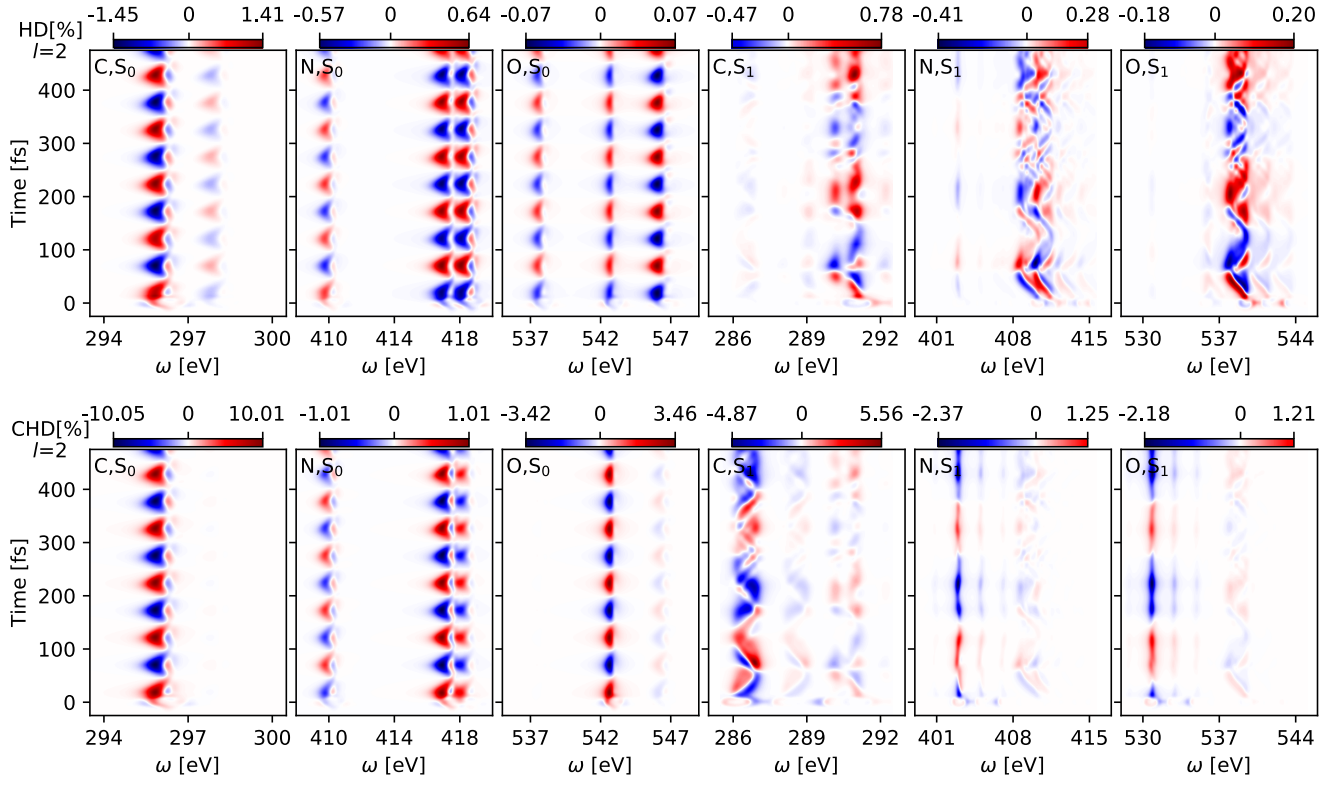

FIG. S3. The tr-HD (top panels) and tr-CHD (bottom panels) signals for  $l = 2$  by probing C, N, and O. Left three panels: contributed by ground state  $S_0$ . Right three panels: contributed by valence excited state  $S_1$



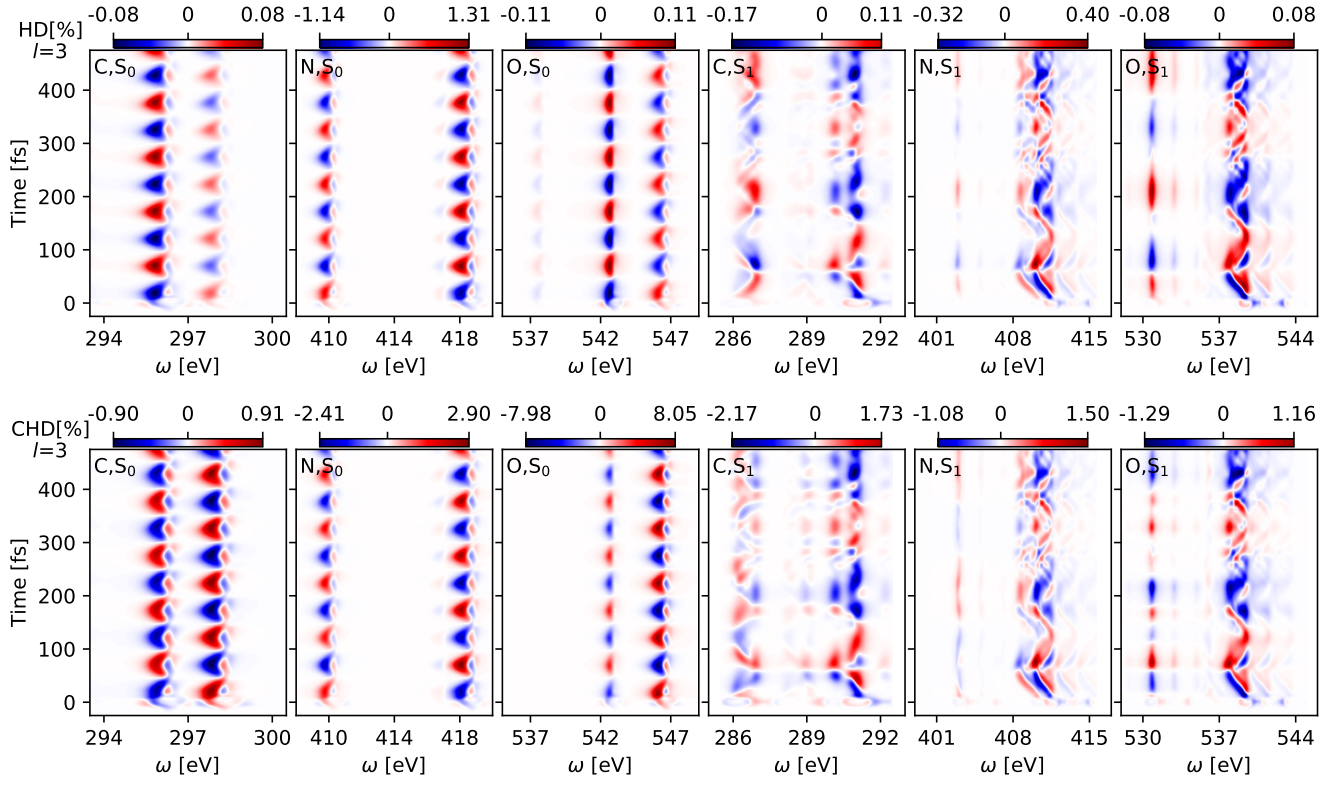

FIG. S4. The tr-HD (top panels) and tr-CHD (bottom panels) signals for  $l = 3$  by probing C, N, and O. Left three panels: contributed by ground state  $S_0$ . Right three panels: contributed by valence excited state  $S_1$

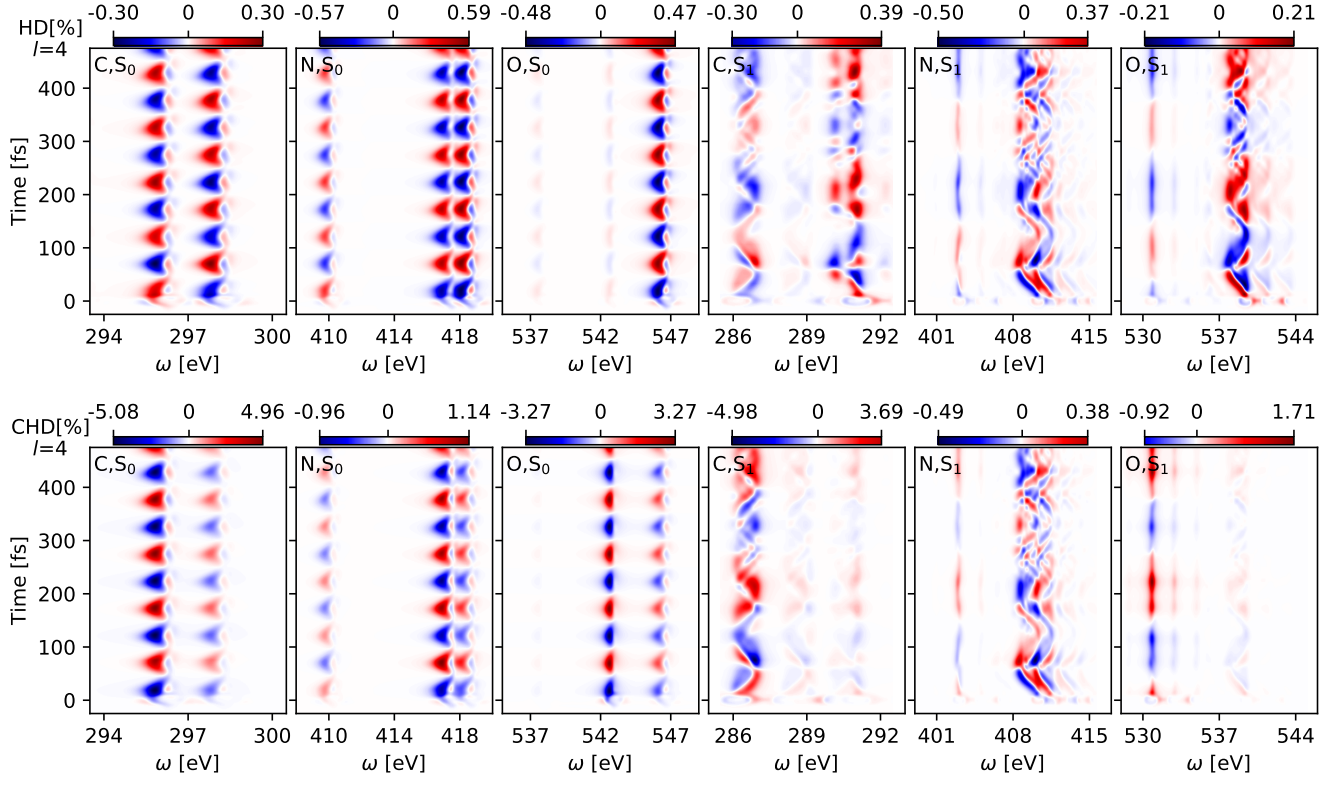

FIG. S5. The tr-HD (top panels) and tr-CHD (bottom panels) signals for  $l = 4$  by probing C, N, and O. Left three panels: contributed by ground state  $S_0$ . Right three panels: contributed by valence excited state  $S_1$
